# Supplementary material for: Overweight and obesity among Vietnamese school-aged children: National prevalence estimates based on the World Health Organization and International Obesity Task Force definition
Source: PubMed Central journal article supplement (PMC7549813; doi:10.1371/journal.pone.0240459), 2020-10-12
Supplement: pone.0240459.s001.pdf [file pone.0240459.s001.pdf]

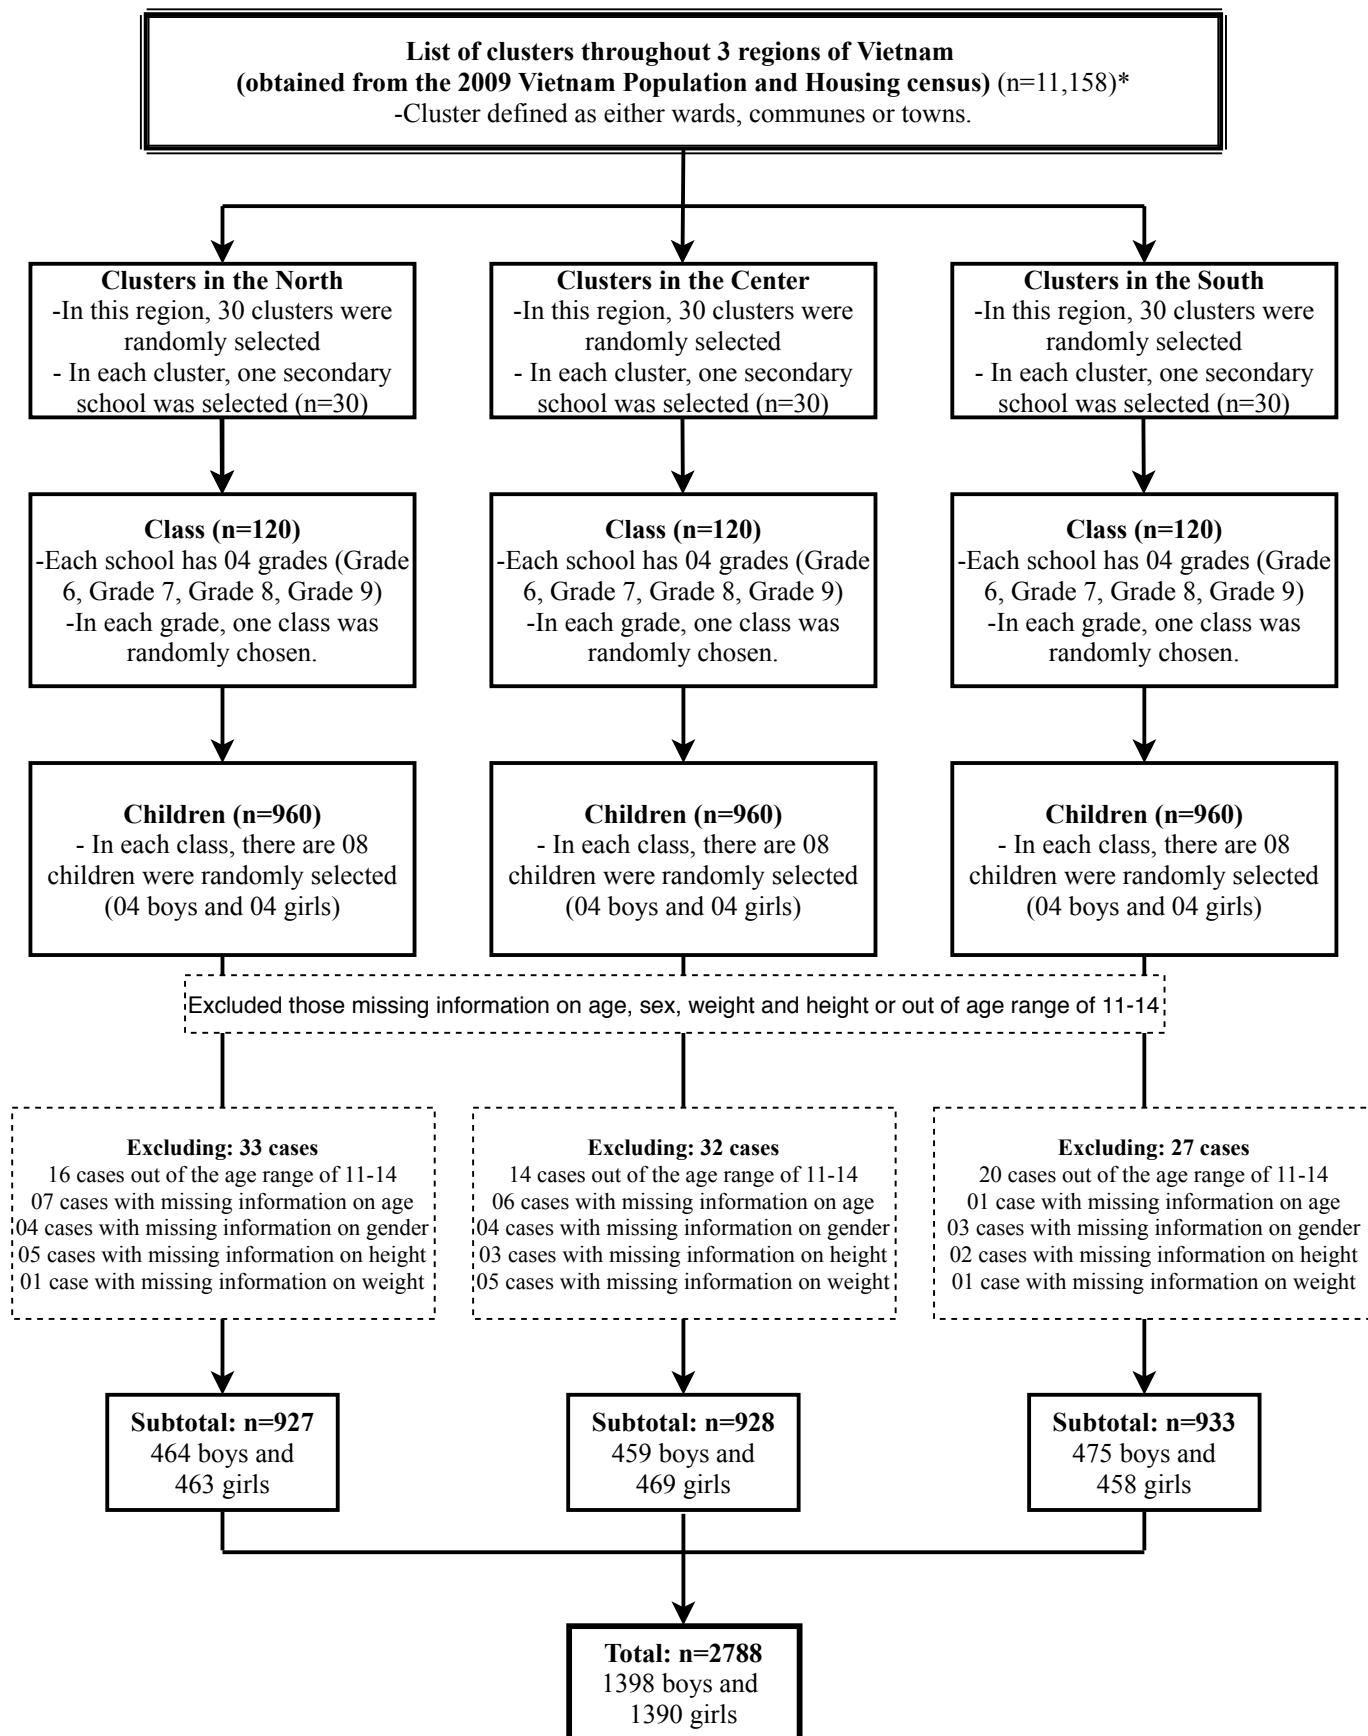

\*General statistics office of Vietnam. The 2009 Vietnam Population and Housing census. 2009.  
<https://www.gso.gov.vn/default.aspx?tabid=512&idmid=5&ItemID=10438>
