# Supplementary material for: Overweight and obesity among Vietnamese school-aged children: National prevalence estimates based on the World Health Organization and International Obesity Task Force definition
Source: PubMed Central journal article supplement (PMC7549813; doi:10.1371/journal.pone.0240459), 2020-10-12
Supplement: pone.0240459.s002.pdf [file pone.0240459.s002.pdf]

**S1 Table. Overweight and obesity prevalence by age and sex based on four BMI metrics including WHO Z-score, WHO percentile, IOTF and CDC references**

|                   | Age | Boys          |      |      | Girls         |      |      | Total#        |      |      |
|-------------------|-----|---------------|------|------|---------------|------|------|---------------|------|------|
|                   |     | WHO - Z-score | CDC  | IOTF | WHO - Z-score | CDC  | IOTF | WHO - Z-score | CDC  | IOTF |
| <b>Overweight</b> | 11  | 20.7          | 30.1 | 23.2 | 15.6          | 16.5 | 15.1 | 18.2          | 23.4 | 19.2 |
| <b>Obesity</b>    |     | 17.7          | 5.8  | 9.1  | 5.4           | 2.3  | 3.7  | 11.6          | 4.1  | 6.4  |
| <b>Overweight</b> | 12  | 22.7          | 30.7 | 25.3 | 14.8          | 16.2 | 14.5 | 18.7          | 23.3 | 19.8 |
| <b>Obesity</b>    |     | 17.8          | 5.7  | 8.6  | 4.2           | 1.7  | 2.8  | 10.9          | 3.7  | 5.7  |
| <b>Overweight</b> | 13  | 19.4          | 19.7 | 16.4 | 15.9          | 16.8 | 15.1 | 17.7          | 18.2 | 15.8 |
| <b>Obesity</b>    |     | 6.7           | 3.2  | 5.1  | 3.4           | 1.1  | 2    | 5.1           | 2.2  | 3.6  |
| <b>Overweight</b> | 14  | 14.2          | 17.4 | 14.2 | 15            | 19.6 | 12.8 | 14.6          | 18.5 | 13.5 |
| <b>Obesity</b>    |     | 9.5           | 5.4  | 7.6  | 4             | 0.6  | 4.7  | 6.7           | 3    | 6.1  |

#Total was rounded up from the percentage of boys and girls

WHO Z-score: equivalent to 1SD-2SD for the overweight group and  $\geq 2SD$  for obesity

CDC: defines overweight as  $85^{th} \leq BMI < 95^{th}$  percentiles, and obesity as  $BMI \geq 95^{th}$  percentile

IOTF: equivalent to 25-30 kg/m<sup>2</sup> for the overweight group and  $\geq 30$  kg/m<sup>2</sup> for obesity at the age of 18
