# Supplementary material for: Overweight and obesity among Vietnamese school-aged children: National prevalence estimates based on the World Health Organization and International Obesity Task Force definition
Source: PubMed Central journal article supplement (PMC7549813; doi:10.1371/journal.pone.0240459), 2020-10-12
Supplement: pone.0240459.s003.pdf [file pone.0240459.s003.pdf]

**S2 Table. Summary of previous findings in Vietnamese children aged 11-16 years old**

| Year | Author                             | Study design                | Location         | Sampling method                                                                   | Criteria          | Overweight prevalence                                                                                   | Obesity prevalence                                                                   |
|------|------------------------------------|-----------------------------|------------------|-----------------------------------------------------------------------------------|-------------------|---------------------------------------------------------------------------------------------------------|--------------------------------------------------------------------------------------|
| 2007 | Hong K Tang et al. [16]            | A cross-sectional survey    | Ho Chi Minh City | 1504 Adolescents aged 11-16 years, mean age of 13.1                               | IOTF              | -Boys: 5.8%<br>-Girls: 4.1%<br>-Total: 4.9%                                                             | -Boys: 0.9%<br>-Girls: 0.3%<br>-Total: 0.6%                                          |
| 2010 | Tang KH et al. [13]                | A cross-sectional survey    | Ho Chi Minh City | 2 678 students aged 11-16 from 31 junior high schools                             | IOTF              | -Boys: 16.2%<br>-Girls: 7.2%<br>-Total: 11.7%                                                           | -Boys: 3.1%<br>-Girls: 1.0%<br>-Total: 2.0%                                          |
| 2010 | Trang HHD Nguyen et al. [17]       | A cross-sectional survey    | Ho Chi Minh City | 693 high-school students from urban districts, mean age of 13.9 (13.7-14.2 years) | IOTF              | -Boy: 20.5% overweight/obese<br>-Girls: 11.4% overweight/obese<br>-Total: 15.5% overweight/obese        |                                                                                      |
| 2010 | The United Nations in Vietnam [12] | A cross-sectional survey    | Nation wide      | Children and adolescents aged 6-19 years                                          | WHO Z-score       | -Boys: 13.0% (aged 11-13 years)<br>-Girls: 6.0% (aged 11-13 years)<br>-Total: 8.5% (children aged 6-19) | -Boys: Not found<br>-Girls: Not found<br>-Total: 0.7% (children aged 6-19)           |
| 2013 | Huong Thi Le et al. [15]           | A nested case-control study | Bac Giang        | 1528 secondary students (11-14 years old) selected from 16 secondary schools      | WHO Z-score       | -Boys: 9.6%<br>-Girls: 3.9%<br>-Total: 6.7%                                                             | -Boys: 2.8%<br>-Girls: 1.2%<br>-Total: 2.0%                                          |
| 2013 | Phuong Van Ngoc Nguyen et al. [14] | A cross-sectional survey    | Ho Chi Minh City | 1,989 students aged 11-14 years in HCM                                            | IOTF, WHO Z-score | -Boys: 22.0% (IOTF)<br>-Girls: 13.3% (IOTF)<br>-Total: 17.8% (IOTF), 19.6% (WHO Z-score)                | -Boys: 5.4% (IOTF)<br>-Girls: 1.3% (IOTF)<br>-Total: 3.2% (IOTF), 7.9% (WHO Z-score) |
| 2013 | Hong TK et al. [18]                | A prospective cohort study  | Ho Chi Minh City | 759 secondary high school students from 18 schools in urban districts.            | IOTF              | -Boy: 16.9% - 21.4% (over 5 years)<br>-Girl: 8.6% - 12.4% (over 5 years)                                | -Boy: 2.3% - 7.1% (over 5 years)<br>-Girl: 1.0% - 3.4% (over 5 years)                |

|      |                       | (2004-2009)              |                  |                                                                                      |                   | -Total: 12.5% - 16.7%<br>(over 5 years)                                                                                            | -Total: 1.7% - 5.1%<br>(over 5 years)                                                                                         |
|------|-----------------------|--------------------------|------------------|--------------------------------------------------------------------------------------|-------------------|------------------------------------------------------------------------------------------------------------------------------------|-------------------------------------------------------------------------------------------------------------------------------|
| 2016 | Nguyen PV et al. [19] | A cross-sectional survey | Ho Chi Minh City | 2024 junior high school students aged 11-14 in all the 14 urban districts            | IOTF              | -Boy: 28.3% overweight/obese<br>-Girls: 14.5% overweight/obese<br>-Total: 21.1% overweight/obese                                   |                                                                                                                               |
| 2018 | To QG et al. [20]     | A cross-sectional survey | Ho Chi Minh City | 619 students in public schools in urban areas, mean age was 10.4 years (9.7 to 12.6) | WHO Z-score       | -Total: 52.7% were overweight/obese                                                                                                |                                                                                                                               |
| 2018 | This present study    | A cross-sectional survey | Nation wide      | 2788 children aged 11-14 years                                                       | IOTF, WHO Z-score | -Boys: 19.4% (WHO Z-score), 19.9% (IOTF)<br>-Girls: 15.3% (WHO Z-score), 14.4% (IOTF)<br>-Total: 17.4% (WHO Z-score), 17.1% (IOTF) | -Boys: 12.9% (WHO Z-score), 7.6% (IOTF)<br>-Girls: 4.2% (WHO Z-score), 3.2% (IOTF)<br>-Total: 8.6% (WHO Z-score), 5.4% (IOTF) |
