# Supplementary material for: Overweight and obesity among Vietnamese school-aged children: National prevalence estimates based on the World Health Organization and International Obesity Task Force definition
Source: PubMed Central journal article supplement (PMC7549813; doi:10.1371/journal.pone.0240459), 2020-10-12
Supplement: pone.0240459.s004.pdf [file pone.0240459.s004.pdf]

**S3 Table. Children' height by age and sex**

| <b>Groups</b>       | <b>Boys (cm)</b>        | <b>Girls (cm)</b>       | <b>Total (cm)</b>       |
|---------------------|-------------------------|-------------------------|-------------------------|
| <b>11 years old</b> |                         |                         |                         |
| Mean (SD)           | 144.45 (8.38)           | 145.58 (7.54)           | 145.01 (7.99)           |
| Median (IQR)        | 144.00 (139.00, 150.00) | 146.00 (140.00, 151.00) | 145.00 (140.00; 150.13) |
| <b>12 years old</b> |                         |                         |                         |
| Mean (SD)           | 151.87 (9.12)           | 149.93 (6.54)           | 150.88 (7.97)           |
| Median (IQR)        | 152.00 (146.00, 158.00) | 150.00 (146.00, 154.00) | 151.00 (146.00; 156.00) |
| <b>13 years old</b> |                         |                         |                         |
| Mean (SD)           | 157.22 (8.43)           | 153.17 (5.87)           | 155.23 (7.56)           |
| Median (IQR)        | 158.00 (151.00, 164.00) | 153.00 (149.50, 157.00) | 155.00 (150.00; 160.00) |
| <b>14 years old</b> |                         |                         |                         |
| Mean (SD)           | 161.82 (7.84)           | 154.27 (6.77)           | 158.02 (8.23)           |
| Median (IQR)        | 162.00 (157.00, 167.00) | 155.00 (150.00, 159.00) | 158.00 (153.00; 163.00) |
