# Supplementary material for: Overweight and obesity among Vietnamese school-aged children: National prevalence estimates based on the World Health Organization and International Obesity Task Force definition
Source: PubMed Central journal article supplement (PMC7549813; doi:10.1371/journal.pone.0240459), 2020-10-12
Supplement: pone.0240459.s005.pdf [file pone.0240459.s005.pdf]

**S4 Table. Prevalence of stunting and thinness by age and sex**

| <b>Groups</b>       | <b>Stunting</b> |               | <b>Thinness</b> |               |
|---------------------|-----------------|---------------|-----------------|---------------|
|                     | <b>n (%)</b>    | <b>95% CI</b> | <b>n (%)</b>    | <b>95% CI</b> |
| <b>Boys</b>         |                 |               |                 |               |
| 11 years old, n (%) | 19 (5.2)        | 3.22-8.43     | 34 (9.4)        | 6.51-13.36    |
| 12 years old, n (%) | 21 (6.0)        | 3.68-9.74     | 27 (7.8)        | 5.20-11.42    |
| 13 years old, n (%) | 24 (6.5)        | 4.08-10.12    | 29 (7.8)        | 5.44-11.11    |
| 14 years old, n (%) | 21 (6.6)        | 4.12-10.48    | 31 (9.8)        | 6.94-13.61    |
| <b>Girls</b>        |                 |               |                 |               |
| 11 years old, n (%) | 27 (7.7)        | 5.15-11.28    | 34 (9.7)        | 6.79-13.56    |
| 12 years old, n (%) | 30 (8.4)        | 5.43-12.65    | 21 (5.8)        | 3.67-9.21     |
| 13 years old, n (%) | 22 (6.1)        | 4.00-9.34     | 22 (6.1)        | 4.09-9.13     |
| 14 years old, n (%) | 31 (9.7)        | 6.15-14.84    | 18 (5.6)        | 3.60-8.63     |
| <b>Total</b>        |                 |               |                 |               |
| 11 years old, n (%) | 46 (6.4)        | 4.62-8.92     | 68 (9.5)        | 7.15-12.58    |
| 12 years old, n (%) | 51 (7.2)        | 5.00-10.31    | 48 (6.8)        | 4.76-9.59     |
| 13 years old, n (%) | 46 (6.3)        | 4.60-8.60     | 51 (7.0)        | 5.40-9.01     |
| 14 years old, n (%) | 52 (8.2)        | 5.63-11.67    | 49 (7.7)        | 5.82-10.07    |

Stunting (<-2 SD height-for-age WHO Z-score) and Thinness (<-2SD weight-for-height WHO Z-score)
