# Supplementary material for: Overweight and obesity among Vietnamese school-aged children: National prevalence estimates based on the World Health Organization and International Obesity Task Force definition
Source: PubMed Central journal article supplement (PMC7549813; doi:10.1371/journal.pone.0240459), 2020-10-12
Supplement: pone.0240459.s006.pdf [file pone.0240459.s006.pdf]

## PHỤ LỤC 1. PHIẾU KHÁM

(do điều tra viên điền)

-----

### I. THÔNG TIN CHUNG

1. Thời gian khám : ..... / ..... / 2018

2. Vùng/khu vực : ..... Mã số:

3. Tỉnh/thành phố: ..... Mã số :

4. Quận/huyện : ..... Mã số :

5. Xã/phường: ..... Mã số :

6. Trường THCS: ..... Mã số :

|  |  |
|--|--|
|  |  |
|  |  |
|  |  |
|  |  |
|  |  |

Bạn có đồng ý trả lời cho khảo sát này không? Đồng ý  Từ chối

### II. THÔNG TIN HỌC SINH

| STT | CÂU HỎI             | TRẢ LỜI             | MÃ     | CHUYÊN |
|-----|---------------------|---------------------|--------|--------|
| 7   | Họ và tên           | .....               | [ ][ ] |        |
| 8   | Ngày tháng năm sinh | ...../...../20...   |        |        |
| 9   | Giới tính           | Nam                 | 1      |        |
|     |                     | Nữ                  | 2      |        |
| 10  | Dân tộc             | Kinh                | 1      |        |
|     |                     | Khác (ghi rõ:.....) | 2      |        |

### III. THĂM KHÁM

| STT | SỐ ĐO                             | GHI CHÚ           |
|-----|-----------------------------------|-------------------|
| 17  | Chiều cao (cm)                    | [ ][ ][ ][ ], [ ] |
| 18  | Cân nặng (kg)                     | [ ][ ][ ][ ], [ ] |
| 24  | Tỷ lệ phần trăm mỡ cơ thể BFP (%) | [ ][ ][ ], [ ]    |

**PHỤ LỤC 2. PHIẾU PHÒNG VẤN**  
(do điều tra viên điền)

-----

**I. THÔNG TIN CHUNG**

1. Thời gian khám : ..... / ..... / 2018
2. Vùng/khu vực : ..... Mã số:
3. Tỉnh/thành phố: ..... Mã số :
4. Quận/huyện : ..... Mã số :
5. Xã/phường: ..... Mã số :
6. Trường THCS: ..... Mã số :

|  |  |
|--|--|
|  |  |
|  |  |
|  |  |
|  |  |
|  |  |

**A. BỘ CÂU HỎI**

**1. Thông tin đối tượng được điều tra.**

| TT | NỘI DUNG            | THÔNG TIN                   | MÃ      | CHUYỂN |
|----|---------------------|-----------------------------|---------|--------|
| 7  | Họ và tên           | .....                       | [ ] [ ] |        |
| 8  | Ngày tháng năm sinh | ...../...../20...           |         |        |
| 9  | Gới tính            | Nam<br>Nữ                   | 1<br>2  |        |
| 10 | Dân tộc             | Kinh<br>Khác (ghi rõ:.....) | 1<br>2  |        |

**4. Thực hành của đối tượng được điều tra đối với phòng chống bệnh ĐTD trẻ em**

**4.2. Chế độ luyện tập và hoạt động thể lực (Đọc thông tin cho đối tượng được hỏi).**

| TT | CÂU HỎI                                      | TRẢ LỜI             | MÃ | CHUYỂN |
|----|----------------------------------------------|---------------------|----|--------|
| 11 | Hàng ngày em đến trường bằng phương tiện gì? | Đi bộ               | 1  |        |
|    |                                              | Đi xe đạp           | 2  |        |
|    |                                              | Đi xe bus           | 3  |        |
|    |                                              | Bố mẹ đưa đi        | 4  |        |
|    |                                              | Phương tiện khác    | 5  |        |
| 12 | Ở nhà em thường giúp đỡ bố mẹ công việc gì?  | Quét nhà            | 1  |        |
|    |                                              | Rửa bát             | 2  |        |
|    |                                              | Lau nhà             | 3  |        |
|    |                                              | Giặt quần áo        | 4  |        |
|    |                                              | Không phải làm gì   | 5  |        |
|    |                                              | Khác (ghi rõ):..... | 6  |        |
| 13 | Em thường chơi môn thể thao gì?              | Cầu lông            | 1  |        |
|    |                                              | Nhảy dây            | 2  |        |

|    |                                                   |                                                                                  |                       |  |
|----|---------------------------------------------------|----------------------------------------------------------------------------------|-----------------------|--|
|    |                                                   | Bóng bàn                                                                         | 3                     |  |
|    |                                                   | Bóng đá                                                                          | 4                     |  |
|    |                                                   | Đá cầu                                                                           | 5                     |  |
|    |                                                   | Bơi                                                                              | 6                     |  |
|    |                                                   | Khác (ghi rõ):.....                                                              | 7                     |  |
| 14 | Em thường chơi bao lâu?                           | .....ngày/tuần<br>.....phút/ngày                                                 |                       |  |
| 15 | Em có chơi điện tử không?                         | Có<br>Không                                                                      | 1<br>2                |  |
| 16 | Em thường chơi bao<br>ngày/tuần ?                 | .....ngày<br>/tuần                                                               |                       |  |
| 17 | Một ngày em chơi điện tử mấy<br>giờ?              | <=1 giờ<br>1 giờ<br>2 giờ<br>3 giờ<br>>=4 giờ                                    | 1<br>2<br>3<br>4<br>5 |  |
| 18 | Em có xem tivi không?                             | Có<br>Không                                                                      | 1<br>2                |  |
| 19 | Em thường xem bao<br>ngày/tuần ?                  | .....ngày<br>/tuần                                                               |                       |  |
| 20 | Một ngày em xem tivi mấy<br>giờ?                  | <=1 giờ<br>1 giờ<br>2 giờ<br>3 giờ<br>>=4 giờ                                    | 1<br>2<br>3<br>4<br>5 |  |
| 21 | Em có sử dụng mạng xã hội<br>(facebook, zalo...)? | Có<br>Không                                                                      | 1<br>2                |  |
| 22 | Em thường sử dụng bao lâu?                        | .....ngày/tuần<br>.....phút/ngày                                                 |                       |  |
| 23 | Em có đi học thêm không?                          | Có<br>Không                                                                      | 1<br>2                |  |
| 24 | Nếu có mức độ học thêm như<br>thế nào?            | 1 buổi/tuần.<br>2 buổi/tuần<br>3 buổi/tuần.<br>4 buổi/tuần<br>≥ 5 buổi buổi/tuần | 1<br>2<br>3<br>4<br>5 |  |

**Điều tra viên**

(Chữ ký, họ tên)

**PHỤ LỤC 3. PHIẾU TỰ ĐIỀN**  
**PHIẾU TỰ ĐIỀN ĐIỀU TRA DỊCH TỄ HỌC BỆNH ĐÁI THÁO ĐƯỜNG**  
**VÀ CÁC YẾU TỐ NGUY CƠ Ở TRẺ EM LỬA TUỔI 11-14 TUỔI**  
**TOÀN QUỐC NĂM 2018**  
**(dành cho phụ huynh)**

-----

**I. THÔNG TIN CHUNG**

1. Thời gian khám : ..... / ..... / 2018
2. Vùng/khu vực : ..... Mã số:.....
3. Tỉnh/thành phố:..... Mã số :.....
4. Quận/huyện : ..... Mã số :.....
5. Xã/phường: ..... Mã số :.....
6. Trường THCS: ..... Mã số :.....

Bạn có đồng ý trả lời cho khảo sát này không? Đồng ý  Từ chối

**Chữ kí của người được điều tra**

**II. PHẦN PHỎNG VẤN**

| TT | CÂU HỎI                    | TRẢ LỜI                                                                      | MÃ                         | CHUYÊN |
|----|----------------------------|------------------------------------------------------------------------------|----------------------------|--------|
| 7  | Họ và tên phụ huynh        | .....                                                                        | [ ] [ ]                    |        |
| 8  | Họ và tên học sinh         | .....                                                                        |                            |        |
| 9  | Trình độ học vấn phụ huynh | Tiểu học<br>THCS<br>THPT<br>THCN/CĐ/ĐH<br>Trên ĐH                            | 1<br>2<br>3<br>4<br>5      |        |
| 10 | Nghề nghiệp phụ huynh      | Cán bộ nhà nước<br>Công nhân<br>Nông dân<br>Buôn bán<br>Nội trợ<br>Nghề khác | 1<br>2<br>3<br>4<br>5<br>6 |        |
| 11 | Cân nặng Anh/chị           | Bố: .....,..... kg<br>Mẹ: .....,..... kg                                     |                            |        |
| 12 | Chiều cao của anh/chị      | Bố: .....,..... m<br>Mẹ: .....,..... m                                       |                            |        |

|    |                                           |                                                |             |  |
|----|-------------------------------------------|------------------------------------------------|-------------|--|
| 13 | Anh chị có mắc bệnh Đái tháo đường không? | Có (Anh hoặc chị mắc)<br>Cả 2 đều mắc<br>Không | 1<br>2<br>3 |  |
| 14 | Anh/chị có bị tăng huyết áp không?        | Có (Anh hoặc chị mắc)<br>Cả 2 đều mắc<br>Không | 1<br>2<br>3 |  |
| 15 | Anh/chị đã từng bị rối loạn mỡ máu không? | Có (Anh hoặc chị mắc)<br>Cả 2 đều mắc<br>Không | 1<br>2<br>3 |  |

**SECTION 1: PHYSICAL MEASUREMENT**

(filled by data collectors)

-----

**IV. GENERAL INFORMATION**

1. Date of interview : ..... / ..... / 2018

2. Region : ..... Code:

3. Province: ..... Code:

4. District : ..... Code:

5. Cluster: ..... Code:

6. Name of school: ..... Code:

|  |  |
|--|--|
|  |  |
|  |  |
|  |  |
|  |  |
|  |  |

*Do you agree to answer this survey?*

Agree

Disagree

**V. STUDENT'S INFORMATION**

| No | QUESTION      | ANSWER                | CODE   | SKIP |
|----|---------------|-----------------------|--------|------|
| 7  | Full name     | .....                 | [ ][ ] |      |
| 8  | Date of birth | ...../...../20...     |        |      |
| 9  | Gender        | Boys                  | 1      |      |
|    |               | Girls                 | 2      |      |
| 10 | Ethnicity     | Kinh                  | 1      |      |
|    |               | Other (specify:.....) | 2      |      |

**VI. MEASURE**

| No | MEASURE                  | NOTE              |
|----|--------------------------|-------------------|
| 11 | Height (cm)              | [ ][ ][ ][ ], [ ] |
| 12 | Weight (kg)              | [ ][ ][ ][ ], [ ] |
| 13 | Body fats percentage (%) | [ ][ ][ ], [ ]    |

SECTION 2. INTERVIEW  
(filled by data collectors)

-----

**GENERAL INFORMATION**

1. Date of interview : ..... / ..... / 2018

2. Region : ..... Code:

3. Province: ..... Code:

4. District : ..... Code:

5. Cluster: ..... Code:

6. Name of school: ..... Code:

|  |  |
|--|--|
|  |  |
|  |  |
|  |  |
|  |  |
|  |  |

*Do you agree to answer this survey?*

Agree

Disagree

***Personal information***

| No | QUESTION      | ANSWER                | CODE   | SKIP |
|----|---------------|-----------------------|--------|------|
| 7  | Full name     | .....                 | [ ][ ] |      |
| 8  | Date of birth | ...../...../20...     |        |      |
| 9  | Gender        | Boys                  | 1      |      |
|    |               | Girls                 | 2      |      |
| 10 | Ethnicity     | Kinh                  | 1      |      |
|    |               | Other (specify:.....) | 2      |      |

***Behavior information***

| No | QUESTION                                                        | ANSWER             | CODE | SKIP |
|----|-----------------------------------------------------------------|--------------------|------|------|
| 11 | What type of transportation that you use to go to school daily? | Walking            | 1    |      |
|    |                                                                 | By bicycle         | 2    |      |
|    |                                                                 | By bus             | 3    |      |
|    |                                                                 | Parent assistance  | 4    |      |
|    |                                                                 | Other              | 5    |      |
| 12 | What type of chore works do you do at home?                     | Sweeping           | 1    |      |
|    |                                                                 | Washing dishes     | 2    |      |
|    |                                                                 | Cleaning the floor | 3    |      |
|    |                                                                 | Washing clothes    | 4    |      |
|    |                                                                 | Nothing            | 5    |      |

|    |                                                         |                                                                                                                   |                                 |  |
|----|---------------------------------------------------------|-------------------------------------------------------------------------------------------------------------------|---------------------------------|--|
|    |                                                         | Others (Specify:.....)                                                                                            | 6                               |  |
| 13 | What type of sports that you usual play?                | Badminton<br>Skipping<br>Table tennis<br>Soccer/Football<br>Shuttlecock kicking<br>Swiming<br>Khác (ghi rõ):..... | 1<br>2<br>3<br>4<br>5<br>6<br>7 |  |
| 14 | How long do you usual play?                             | .....days/week<br>.....minutes/day                                                                                |                                 |  |
| 15 | Do you play video games?                                | Yes<br>No                                                                                                         | 1<br>2                          |  |
| 16 | How long do you usual play?                             | .....days/week                                                                                                    |                                 |  |
| 17 | How many hours that you usual play video games per day? | <1 hour<br>1 hour<br>2 hours<br>3 hours<br>≥4 hours                                                               | 1<br>2<br>3<br>4<br>5           |  |
| 18 | Do you watching television?                             | Yes<br>No                                                                                                         | 1<br>2                          |  |
| 19 | How long do you usual watch TV?                         | .....days/week                                                                                                    |                                 |  |
| 20 | How many hours that you usual watch TV per day?         | <1 hour<br>1 hour<br>2 hours<br>3 hours<br>≥4 hours                                                               | 1<br>2<br>3<br>4<br>5           |  |
| 21 | Do you use social media (Facebook, Zalo,...)?           | Yes<br>No                                                                                                         | 1<br>2                          |  |
| 22 | How long do you usual use?                              | .....days/week<br>.....minutes/day                                                                                |                                 |  |
| 23 | Do you take an extra class?                             | Yes<br>No                                                                                                         | 1<br>2                          |  |
| 24 | If yes, how many extra classes do you have every week?  | 1 section/week<br>2 sections/week<br>3 sections/week<br>4 sections/week<br>≥ 5 sections/week                      | 1<br>2<br>3<br>4<br>5           |  |

**Data collector**

(Sign)



SECTION 3. SELF-REPORT QUESTIONNAIRE

(for student's parent)

-----

1. Date of report : ..... / ..... / 2018

2. Region : ..... Code:

3. Province: ..... Code:

4. District : ..... Code:

5. Cluster: ..... Code:

6. Name of school: ..... Code:

|  |  |
|--|--|
|  |  |
|  |  |
|  |  |
|  |  |
|  |  |

*Do you agree to answer this survey?*

Agree

Disagree

**Signature**

| No | QUESTION                                                | ANSWER                                                                                                  | CODE                       |
|----|---------------------------------------------------------|---------------------------------------------------------------------------------------------------------|----------------------------|
| 7  | What's your full name?                                  | .....                                                                                                   |                            |
| 8  | What's your children's name?                            | .....                                                                                                   |                            |
| 9  | What is the highest education level that you completed? | Primary school<br>Secondary school<br>High school<br>Vocational/College/Univeristy<br>Postgraduate      | 1<br>2<br>3<br>4<br>5      |
| 10 | What is your main occupation?                           | Government employee<br>Industry worker<br>Farmer<br>Self-employ<br>Home makers<br>Other (specify:.....) | 1<br>2<br>3<br>4<br>5<br>6 |
| 11 | What are your partner's and your weight?                | Farther: .....,..... kg<br>Mother: .....,..... kg                                                       |                            |
| 12 | What are your partner's and your height?                | Farther: .....,..... m<br>Mother: .....,..... m                                                         |                            |
| 13 | Do you or your partner suffer from hypertension?        | Yes, only one<br>Yes, both<br>No                                                                        | 1<br>2<br>3                |

|    |                                                    |               |   |
|----|----------------------------------------------------|---------------|---|
| 14 | Do you or your partner suffer from diabetes?       | Yes, only one | 1 |
|    |                                                    | Yes, both     | 2 |
|    |                                                    | No            | 3 |
| 15 | Do you or your partner suffer from hyperlipidemia? | Yes, only one | 1 |
|    |                                                    | Yes, both     | 2 |
|    |                                                    | No            | 3 |
